# Supplementary material
Source: PubMed Central journal article supplement (PMC3818861)
Supplement: mbt0004-0207-SD1.pdf [file mbt0004-0207-SD1.pdf]

## Supporting information

### Experimental procedures in Supporting information

#### Strain construction and confirmation.

**Construction of pIJ12141:** Two 2 kb fragments PCR-amplified with primer pairs act71/act73 and act90/act92 were cloned into pKC1132 using *HindIII/BamHI* and *BamHI/EcoRI* restriction sites contained in the vector or designed into the oligonucleotide primers.

**Construction of pIJ12142:** Two 2 kb fragments PCR-amplified with primer pairs red77/red78 and red96/red98 were cloned into pKC1132 using *HindIII/XbaI* and *XbaI/EcoRI* restriction sites contained in the vector or designed into the oligonucleotide primers.

**Construction of pIJ12143:** Two 2 kb fragments PCR-amplified with primer pairs cpk69/cpk70 and cpk87/cpk88 were cloned into pKC1132 using *HindIII/XbaI* and *XbaI/EcoRI* restriction sites contained in the vector or designed into the oligonucleotide primers.

**Construction of pIJ12144:** The kanamycin resistance gene *neo* was excised from pTC192-Km with *XbaI* and cloned into the *XbaI* site of pIJ12143, with a 5'-3' orientation from cpk70 to cpk87.

**Construction of pIJ12145:** Cosmid StE63 was PCR-targeted with the *aac(3)IV-oriT* cassette from pIJ773 amplified with primers *cdaRDT1* and *cdaRDT2* as previously described (Gust *et al.*, 2003; Gust *et al.*, 2004) resulting in the deletion of *cdaPSI* and most of the *cdaPSII* open reading frame. Desired clones were confirmed by PCR with primers *cdaTST1* and *cdaTST2*.

**Construction of pIJ12146:** Two 2 kb fragments PCR-amplified with primer *cda10/cda11* and *cda47/cda49* were cloned into pKC1132 using *HindIII/XbaI* and *XbaI/EcoRI* restriction sites contained in the vector or designed into the oligonucleotide primers.

**Construction of pIJ12149:** A 759 bp *PstI/BamHI* DNA fragment containing *rpsL* was subcloned from cosmid StD40A in pBluescript II KS(+) digested with the same enzymes, and used for *in vitro* directed mutagenesis using QuikChange® Kit (Stratagene) and the oligonucleotides *a43g\_c52t/a43g\_c52t\_antisense*, designed with the web-based tool "QuikChange® Primer Design Program" provided by Stratagene. After identifying a mutant clone by sequencing, a 3978 bp *BamHI/NotI* fragment containing the region downstream of *rpsL*, and a 6090 bp *NotI/PstI* fragment containing the region upstream of *rpsL*, were cloned from cosmid StD40A into the mutant clone to provide sufficient flanking homology for efficient recombination. Finally, the *aac(3)IV-oriT* cassette from pIJ773 was inserted into the construct with *EcoRI/HindIII*, yielding pIJ12149.

**Construction of pIJ12150:** A 13166 bp *PstI* fragment containing *rpoB* was subcloned from cosmid StD40A in pBluescript II KS(+). The *aac(3)IV-oriT* cassette from pIJ773 was introduced upstream of the putative promoter of *rpoB* by PCR-targeting with primers *rpoB\_RDT1* and *rpoB\_RDT2* (Gust *et al.*, 2003; Gust *et al.*, 2004). Desired clones were confirmed by PCR with primers *rpoB\_TST1* and *rpoB\_TST2*.

**Construction of pIJ12151:** A *BamHI/PstI* 4825 bp DNA fragment containing *rpoB* was subcloned from cosmid StD40A in pBluescript II KS(+) and used for *in vitro*

directed mutagenesis using QuikChange® kit (Stratagene) and the oligonucleotides *c1633t/c1633t\_antisense*, designed with the web-based tool "QuikChange® Primer Design Program" provided by Stratagene. After identifying a mutant clone by sequencing with oligonucleotides *rpoBmut\_tst1* and *rpoBmut\_tst2*, a 3496 bp *NotI/MluI* fragment containing the region upstream of *rpoB* was cloned from cosmid StD40A into the same sites of the mutant clone, providing sufficient homology for efficient recombination. Finally, the *neo-oriT* cassette from pIJ776 was inserted into the construct with *EcoRI/ClaI*, yielding pIJ12151

**Genomotyping with Affymetrix arrays.** Genomic DNA was isolated from M145 and M1146 using a phenol-based method (Weaver *et al.*, 2004) and from M145 and M1154 using a salting-out procedure (Kieser *et al.*, 2000). Both methods gave equivalent labeling efficiency. Labeling was performed with BioPrime DNA Labeling System Kit (Invitrogen) using a modified protocol: 60  $\mu$ l of 2.5X random primers were added to 300 ng of DNA dissolved in 72  $\mu$ l water, the DNA denatured at 98  $^{\circ}$ C for 10 min, followed by cooling to 4  $^{\circ}$ C for 10 min; 15  $\mu$ l 10X dNTP mix and 3  $\mu$ l Klenow (40 U/ $\mu$ l) were added and the mixture incubated at 25  $^{\circ}$ C for 18 h (all previous incubation steps were performed in a thermocycler); DNA was precipitated by adding 15  $\mu$ l sodium acetate 3 M pH 5.2 and 400  $\mu$ l ethanol -20  $^{\circ}$ C, followed by incubation at -80  $^{\circ}$ C for 1 h, and centrifugation at 13000 rpm at 4  $^{\circ}$ C for 1 h; the pellet was washed with 70% ethanol in water, air dried for 10 min, and re-suspended in 110  $\mu$ l of water. Labeling quality control was performed using a gel-shift assay: For a positive control, 5  $\mu$ l of labeled product were mixed with 2  $\mu$ l of 2 mg/ml NeutrAvidin; for a negative control, 5  $\mu$ l of labeled product were mixed with 2  $\mu$ l water; both were loaded immediately onto a 2% agarose gel in TBE buffer (Sambrook *et al.*, 1989) and run at 99 V for 15 min. Affymetrix chip hybridization, washing and scanning was performed as described (Hesketh *et al.*, 2007). Raw data files (CEL files) were loaded into GeneSpring 7, processed with the RMA algorithm and "per chip" normalized to the 50th percentile. M145 versus M1146 genomotyping was performed once, while M145 versus M1154 genomotyping was performed three times. Normalized intensities were displayed on a scatter-plot, with M145 and derived mutants along the X and Y axis, respectively (Fig. S1). We chose a two-fold threshold to identify differentially represented genes. Deleted genes were used as negative controls and the fragments used for homologous recombination as positive controls. All of the positive controls were within the +/- two-fold threshold, while most of the negative controls were well below the two-fold threshold. The higher than expected ratio of some of the negative controls is thought to reflect cross-hybridization with other regions of the genome. For example, while several deleted genes from the *cda* cluster gave higher than expected intensities, Southern blotting and hybridization with a probe comprising the deleted genes confirmed their absence, but also identified cross-hybridising DNA fragments from elsewhere in the genome (Fig. S1C). All of the probes representing non-deleted genes grouped along the diagonal, within the +/- two-fold threshold, indicating that no gene deletions other than those expected or extraneous gene amplifications had occurred during strain construction (Fig. S1A,B).

**Table S1:** Oligonucleotides used in this study.

| Name                    | Sequence                                                                 | Genome coordinates  | Notes                                                                                               |
|-------------------------|--------------------------------------------------------------------------|---------------------|-----------------------------------------------------------------------------------------------------|
| act71                   | GGCG <u>GaAGCt</u> tAGCAGCAACTC                                          | 5513841..5513862    |                                                                                                     |
| act73                   | GACCG <u>gaTCC</u> CTGCTCCAGGAC                                          | c(5515912..5515933) | Deletion of actinorhodin gene cluster*                                                              |
| act90                   | ACGCT <u>GGATCCC</u> GACACCCTGA                                          | 5532919..5532940    |                                                                                                     |
| act92                   | GCAG <u>GaAttCGCC</u> GCCGAGCAC                                          | c(5535028..5535049) |                                                                                                     |
| red77                   | CGGCAAG <u>GcTt</u> CGTACGCTGGTG                                         | 6432862..6432883    |                                                                                                     |
| red78                   | CCG <u>tCtAGa</u> CCGGCGTTGGCGAA                                         | c(6434856..6434878) | Deletion of prodiginines gene cluster*                                                              |
| red96                   | GTCG <u>TcT</u> AGAGCGCGGACACC                                           | 6462141..6462161    |                                                                                                     |
| red98                   | CGTC <u>GAA</u> ttCCTCGCCGTATCGC                                         | c(6464140..6464162) |                                                                                                     |
| cpk69                   | TCCCCA <u>agc</u> TTGAACAACGTG                                           | 6894164..6894184    |                                                                                                     |
| cpk70                   | ACCTT <u>CtAGa</u> CGGAGGACGAGA                                          | c(6896173..6896194) | Deletion of <i>cpk</i> gene cluster*                                                                |
| cpk87                   | CGTGGT <u>Cta</u> GATCGTCGAGCC                                           | 6946389..6946409    |                                                                                                     |
| cpk88                   | GCGAG <u>Gaat</u> TCGTCGGAGCCGA                                          | c(6948344..6948365) |                                                                                                     |
| cdaRDT1                 | CACACATCTTGTTCGTTTTGCATTGTGAGGAG<br>ACAGTG <u>GATTC</u> CGGGGATCCGTCGACC | 3543298..3543336    | Substitution of <i>cdaPSI</i> and <i>cdaPSII</i> with <i>aac(3)IV</i> by PCR-targeting <sup>†</sup> |
| cdaRDT2                 | CCGGTCCTCGCGCACCACGGCCACCGCCTCC<br>GGCACCCCTGTAGGCTGGAGCTGCTTC           | c(3574692..3574730) |                                                                                                     |
| cdaTST1                 | GCTCCTACCTGCGGTTATCTTCC                                                  | 3543187..3543209    |                                                                                                     |
| cdaTST2                 | AACGCCGACGGCACCATGTAGTC                                                  | c(3574833..3574855) |                                                                                                     |
| cda10                   | CCGCG <u>aAGC</u> tACGCAGCAACC                                           | 3519458..3519479    |                                                                                                     |
| cda11                   | CATCG <u>tCtAG</u> ATGAAGCCCCGCA                                         | c(3521498..3521520) | Deletion of CDA gene cluster*                                                                       |
| cda47                   | CGACCT <u>CtAGa</u> CGGGCCAGCAC                                          | 3600279..3600300    |                                                                                                     |
| cda49                   | GCACG <u>GaATT</u> CTGGCCGAGGATC                                         | c(3602271..3602293) |                                                                                                     |
| rpsL_RDT1               | AGCGGGCGGCGATGCCGGTGTGCGCCATTTG<br>TTTTGAC <u>ATTCC</u> GGGGATCCGTCGACC  | 5088690..5088728    | Introduction of <i>rpsL</i> K88E and P91S mutations <sup>†</sup>                                    |
| rpsL_RDT2               | CCAGGCACAAGGTATGAGCGTACCTAGCGCA<br>TTCGCTG <u>CTGT</u> AGGCTGGAGCTGCTTC  | c(5088729..5088767) |                                                                                                     |
| rpsL_TST1               | CTGCTGGTCTACACGCTGAC                                                     | 5088417..5088436    |                                                                                                     |
| rpsL_TST2               | TTCAGCAGCACCTTGTGAT                                                      | c(5089397..5089416) |                                                                                                     |
| a43g_c52t               | CGGCCGTGTGgAGGACCTGtCGGGTGTTCG                                           | 5089196..5089225    |                                                                                                     |
| a43g_c52t_an<br>tisense | CGAACACCCG <u>aCAG</u> GTCTcCACACGGCCG                                   | c(5089196..5089225) |                                                                                                     |

Table S1 continues on the next page.

**Table S1:** Oligonucleotides used in this study (continued).

| Name                 | Sequence                                                        | Genome coordinates  | Notes                                                                                 |
|----------------------|-----------------------------------------------------------------|---------------------|---------------------------------------------------------------------------------------|
| rpoB_RDT1            | CGAAGAGCGATCATCCATCCGGGTGGTCGCT<br>CTTCGGCGATTCCGGGGATCCGTCGACC | 5077519..5077557    | Introduction of <i>aac(3)IV</i> upstream of <i>rpoB</i> by PCR-targeting <sup>†</sup> |
| rpoB_RDT2            | CGTCACTCGTGCAAGGCGACCGCCGCGGAC<br>CCCGGATATGTAGGCTGGAGCTGCTTC   | c(5077558..5077596) |                                                                                       |
| rpoB_TST1            | TGCCGAATTAGTGGAAGGAC                                            | 5077060..5077079    |                                                                                       |
| rpoB_TST2            | TCAGACATGCTCTGGTCGTC                                            | c(5077943..5077962) |                                                                                       |
| rpoBmut_tst1         | GATCCAGAACCAGGTCCGTA                                            | 5079169..5079188    | Introduction of <i>rpoB</i> S433L mutation <sup>‡</sup>                               |
| rpoBmut_tst2         | GATGACGAAGCGGTCCTC                                              | c(5079623..5079640) |                                                                                       |
| c1633t               | CCAGAACAACCCGCTGTtGGGGCTGAC                                     | 5079340..5079366    |                                                                                       |
| c1633t_antise<br>nse | GTCAGCCCCaACAGCGGGTTGTTCTGG                                     | c(5079340..5079366) |                                                                                       |
| rpoBsq1              | GGTACGGCGTCTCGATGAAG                                            | c(5079547..5079566) |                                                                                       |
| Cm84F                | GACATCCAGCGGTCCAAC                                              | Not applicable      | Analysis of expression of chloramphenicol genes by qRT-PCR                            |
| Cm84R                | CGGAGTTCCTCGAAGACG                                              | Not applicable      |                                                                                       |
| Cm86F                | ACGAGATCTGCCTGACCAAC                                            | Not applicable      |                                                                                       |
| Cm86R                | CCTTGATGGGCTTGGACTC                                             | Not applicable      |                                                                                       |
| Cm88F                | GGAATTCCTGCCCTGTC                                               | Not applicable      |                                                                                       |
| Cm88R                | AACCAGTCGTCCTTGAGGTG                                            | Not applicable      |                                                                                       |
| Sco4742F             | CAGCCGTGCCATCAGTTC                                              | 5157225..5157242    | qRT-PCR controls (Hesketh <i>et al.</i> , 2009)                                       |
| Sco4742R             | ACTGCGTACAGCGTGGAAAC                                            | c(5157262..5157281) |                                                                                       |
| hrdBF                | TCGACTACACCAAGGGCTAC                                            | 6368617..6368636    |                                                                                       |
| hrdBR                | GTTGATGACCTCGACCATGT                                            | c(6368725..6368744) |                                                                                       |

\*Sites for restriction endonucleases are underlined. Lower case letters indicate differences from the original sequence.

<sup>†</sup>Universal sequences for cassette amplification (Gust *et al.*, 2003; 2004) are underlined. Lower case letters indicate differences from the original sequence.

<sup>‡</sup>Lower letters indicate differences from the original sequence.

**Table S2:** Vectors and constructs used in this study.

| Vector/Construct     | Description                                                                                                     | Reference                             |
|----------------------|-----------------------------------------------------------------------------------------------------------------|---------------------------------------|
| pAH91                | Conjugative and $\phi$ C31-integrative cosmid containing chloramphenicol gene cluster from <i>S. venezuelae</i> | Andy Hesketh, unpublished             |
| pAH88                | Conjugative and $\phi$ BT1-integrative SCBAC28G1                                                                | Andy Hesketh, unpublished             |
| pBluescript II KS(+) | General cloning vector                                                                                          | Alting-Mees and Short, 1989           |
| pCGC002              | Conjugative and $\phi$ C31-integrative cosmid containing congocidine gene cluster from <i>S. ambofaciens</i>    | Juguet <i>et al.</i> , 2009           |
| pGEM-T-easy          | T-cloning vector for Taq-PCR products                                                                           | Promega Corp.                         |
| pIJ773               | pBluescript II KS(+) containing <i>aac(3)IV-oriT</i> cassette                                                   | Gust <i>et al.</i> , 2003; 2004       |
| pIJ776               | pBluescript II KS(+) containing <i>neo-oriT</i> cassette                                                        | Gust <i>et al.</i> , 2003; 2004       |
| pKC1132              | Cloning vector, RP2-conjugative                                                                                 | Bierman <i>et al.</i> , 1992          |
| pTC192-Km            | Source of <i>neo</i> (kanamycin resistance gene)                                                                | Rodríguez-García <i>et al.</i> , 2006 |
| StE63                | Cosmid from <i>S. coelicolor</i> genomic library                                                                | Redenbach <i>et al.</i> , 1996        |
| pIJ12141             | Deletion of actinorhodin gene cluster                                                                           | This work                             |
| pIJ12142             | Deletion of prodiginines gene cluster                                                                           | This work                             |
| pIJ12143             | Deletion of PKS-I <i>cpk</i> gene cluster                                                                       | This work                             |
| pIJ12144             | Replacement of PKS-I <i>cpk</i> gene cluster with <i>neo</i>                                                    | This work                             |
| pIJ12145             | Replacement of <i>cdaPSI</i> and <i>cdaPSII</i> with <i>aac(3)IV</i>                                            | This work                             |
| pIJ12146             | Deletion of remaining CDA gene cluster                                                                          | This work                             |
| pIJ12149             | Replacement of wild-type <i>rpsL</i> with mutated <i>rpsL</i>                                                   | This work                             |
| pIJ12150             | Introduction of <i>aac(3)IV</i> upstream of <i>rpoB</i>                                                         | This work                             |
| pIJ12151             | Replacement of wild-type <i>rpoB</i> with mutated <i>rpoB</i>                                                   | This work                             |

**Table S3:** Strains used in this study.

| Strain                              | Genotype or Comments                                                                                                                                                                                                                                  | Reference                       |
|-------------------------------------|-------------------------------------------------------------------------------------------------------------------------------------------------------------------------------------------------------------------------------------------------------|---------------------------------|
| <i>Escherichia coli</i> DH5alpha    | F <sup>-</sup> $\phi$ 80/ <i>lacZ</i> $\Delta$ M15 $\Delta$ ( <i>lacZYA-argF</i> )U169 <i>recA1 endA1 hsdR17</i> (r <sub>k</sub> <sup>-</sup> , m <sub>k</sub> <sup>+</sup> ) <i>phoA supE44 thi-1 gyrA96 relA1 <math>\lambda</math></i> <sup>-</sup> | Hanahan, 1983                   |
| <i>E. coli</i> BW25113[pIJ790]      | K-12 derivative ( $\Delta$ <i>araBAD</i> , $\Delta$ <i>rhaBAD</i> ) carrying plasmid pIJ790                                                                                                                                                           | Gust <i>et al.</i> , 2003; 2004 |
| <i>E. coli</i> ET12567[pUZ8002]     | <i>dam dcm hsdM hsdS hsdR cat tet</i> , carrying plasmid pUZ8002                                                                                                                                                                                      | Gust <i>et al.</i> , 2003; 2004 |
| <i>Micrococcus luteus</i> ATCC 4698 | Bioassay indicator microorganism                                                                                                                                                                                                                      | ATCC                            |
| <i>S. coelicolor</i> M145           | SCP1 <sup>-</sup> SCP2 <sup>-</sup> derivative from A3(2) [wild type]                                                                                                                                                                                 | Kieser <i>et al.</i> , 2000     |
| <i>S. coelicolor</i> M1141          | $\Delta$ <i>act</i>                                                                                                                                                                                                                                   | This work                       |
| <i>S. coelicolor</i> M1142          | $\Delta$ <i>act</i> $\Delta$ <i>red</i>                                                                                                                                                                                                               | This work                       |
| <i>S. coelicolor</i> M1143          | $\Delta$ <i>act</i> $\Delta$ <i>red</i> $\Delta$ <i>cpk::neo</i>                                                                                                                                                                                      | This work                       |
| <i>S. coelicolor</i> M1144          | $\Delta$ <i>act</i> $\Delta$ <i>red</i> $\Delta$ <i>cpk</i>                                                                                                                                                                                           | This work                       |
| <i>S. coelicolor</i> M1145          | $\Delta$ <i>act</i> $\Delta$ <i>red</i> $\Delta$ <i>cpk</i> $\Delta$ <i>cdaPSI&amp;II::aac(3)IV</i>                                                                                                                                                   | This work                       |
| <i>S. coelicolor</i> M1146          | $\Delta$ <i>act</i> $\Delta$ <i>red</i> $\Delta$ <i>cpk</i> $\Delta$ <i>cda</i>                                                                                                                                                                       | This work                       |
| <i>S. coelicolor</i> M1151          | $\Delta$ <i>act</i> $\Delta$ <i>red</i> $\Delta$ <i>cpk</i> $\Delta$ <i>cda</i> with <i>aac(3)IV</i> upstream <i>rpoB</i>                                                                                                                             | This work                       |
| <i>S. coelicolor</i> M1152          | $\Delta$ <i>act</i> $\Delta$ <i>red</i> $\Delta$ <i>cpk</i> $\Delta$ <i>cda</i> <i>rpoB</i> (C1298T) <sup>†</sup>                                                                                                                                     | This work                       |
| <i>S. coelicolor</i> M1153          | $\Delta$ <i>act</i> $\Delta$ <i>red</i> $\Delta$ <i>cpk</i> $\Delta$ <i>cda</i> <i>rpoB</i> (C1298T) <sup>†</sup> <i>rpsL</i> (A262G C271T) <sup>‡</sup>                                                                                              | This work                       |
| <i>S. coelicolor</i> M1154          | $\Delta$ <i>act</i> $\Delta$ <i>red</i> $\Delta$ <i>cpk</i> $\Delta$ <i>cda</i> <i>rpoB</i> (C1298T) <sup>†</sup> <i>rpsL</i> (A262G) <sup>§</sup>                                                                                                    | This work*                      |
| <i>S. coelicolor</i> M1155          | $\Delta$ <i>act</i> $\Delta$ <i>red</i> $\Delta$ <i>cpk</i> $\Delta$ <i>cda</i> <i>rpsL</i> (A262G C271T) <sup>‡</sup>                                                                                                                                | This work                       |
| <i>S. coelicolor</i> M1156          | $\Delta$ <i>act</i> $\Delta$ <i>red</i> $\Delta$ <i>cpk</i> $\Delta$ <i>cda</i> <i>rpsL</i> (A262G) <sup>§</sup>                                                                                                                                      | This work*                      |

\*Selected as spontaneously resistant mutant at 5  $\mu$ g/ml of streptomycin.

<sup>†</sup>*rpoB*(S433L) in amino acid notation

<sup>‡</sup>*rpsL*(K88E P91S) in amino acid notation

<sup>§</sup>*rpsL*(K88E) in amino acid notation

## Results in Supporting information

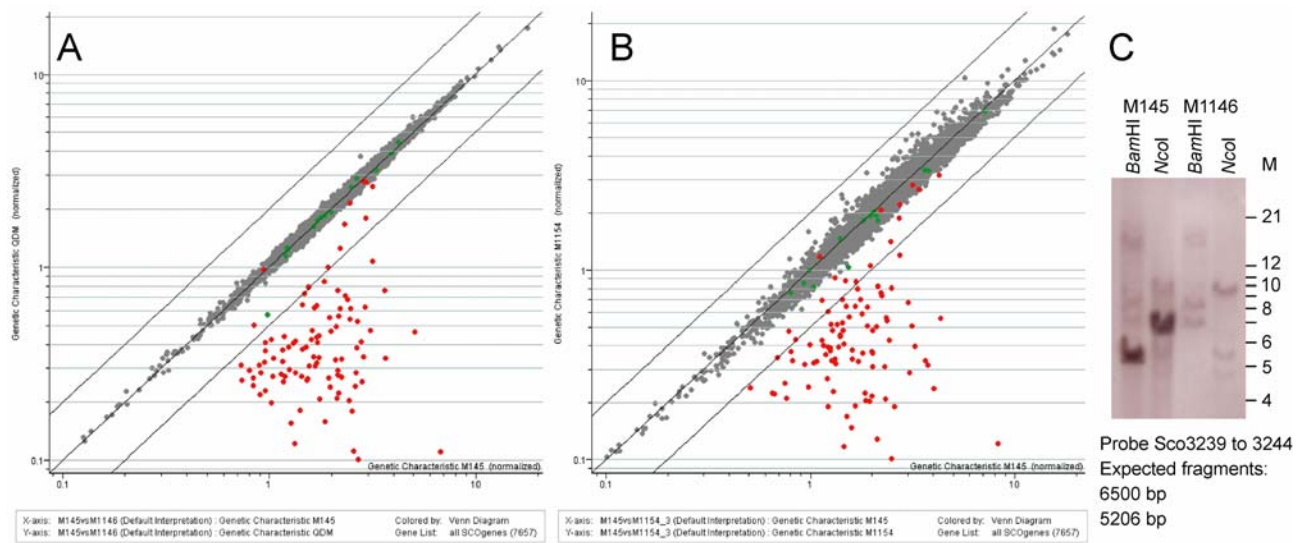

**Fig. S1.** Genotyping analysis. **A** Scatter plot of normalized data from the quadruple deletion mutant (QDM) M1146 (Y-axis) versus M145 (X-axis). **B** Scatter plot of normalized data from M1154 (Y-axis) versus M145 (X-axis). In green, positive controls (fragments used for homologous hybridization); in red, negative controls (deleted genes); in grey, rest of the genes; diagonal lines from top to bottom, two-fold increase in intensity, 1:1 ratio and two-fold decrease in intensity. **C** Southern blot of digested DNA from M145 and M1146 hybridized with a probe derived from some of the genes deleted from the *cda* gene cluster that gave higher than expected intensities upon genotyping. The expected fragments are detected only in M145 and not in M1146, while several cross-hybridizing fragments are observed in both strains.

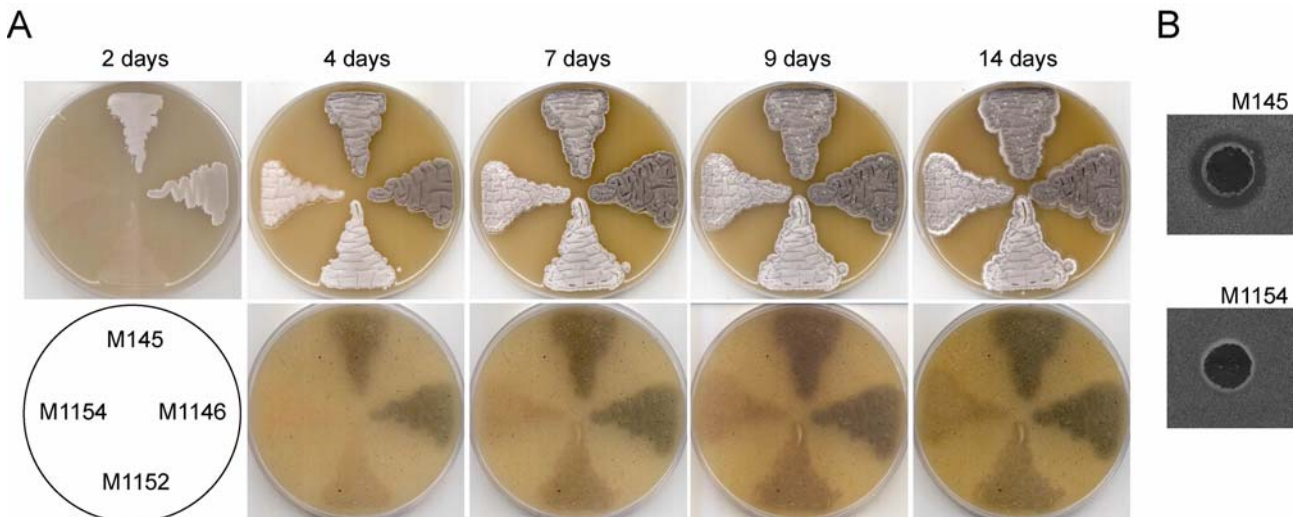

**Fig. S2.** Growth and differentiation. **A** Growth and sporulation on SFM agar medium. Plates were scanned from above (top row) and below (bottom row; the image was inverted horizontally for easier interpretation) at the indicated times. Note the delayed growth and reduction in spore pigmentation in M1152 and M1154. **B** Antimicrobial activity detected in M145 but not in M1154 GYM culture supernatants.

**Table S4:** Data for Figure 3 for chloramphenicol (CP) (Fig. 3A) and congocidine (CGC) (Fig. 3B) production. Strains were grown in liquid GYM medium inoculated with pre-germinated spores (chloramphenicol gene cluster) or with mycelium from a seed culture (congocidine gene cluster).

| Fig. 3A                 |       | Exponential growth phase |             | Stationary growth phase |             |
|-------------------------|-------|--------------------------|-------------|-------------------------|-------------|
|                         |       | Average                  | Std. Dev.   | Average                 | Std. Dev.   |
| Growth                  | M145  | 1.0767                   | 0.0666      | 2.9500                  | 0.0707      |
|                         | M1146 | 0.9933                   | 0.0513      | 2.2767                  | 0.4637      |
|                         | M1152 | 0.8767                   | 0.1172      | 1.5200                  | 0.0458      |
|                         | M1154 | 1.0433                   | 0.0306      | 1.2600                  | 0.2007      |
| $\mu\text{g CP/ml}$     | M145  | 0.0387                   | 0.0085      | 1.6068                  | 0.5586      |
|                         | M1146 | 0.0365                   | 0.0030      | 4.6783                  | 1.8549      |
|                         | M1152 | 1.4349                   | 0.3466      | 41.2412                 | 5.7272      |
|                         | M1154 | 5.0205                   | 1.4593      | 26.2375                 | 4.5116      |
| $\mu\text{g CP/mg DCW}$ | M145  | 0.0359                   | 0.0075      | 0.5471                  | 0.2025      |
|                         | M1146 | 0.0367                   | 0.0020      | 2.1439                  | 1.0503      |
|                         | M1152 | 1.6487                   | 0.4385      | 27.2231                 | 4.5859      |
|                         | M1154 | 4.8014                   | 1.3125      | 21.1335                 | 4.8376      |
| <i>hrdB</i> qPCR        | M145  | 117325.8333              | 68642.2372  | 347097.8333             | 32145.3100  |
|                         | M1146 | 186474.2556              | 121387.0212 | 541392.7778             | 374769.5212 |
|                         | M1152 | 117831.2444              | 17886.4626  | 912278.6667             | 279271.6165 |
|                         | M1154 | 236464.0000              | 52542.6905  | 222504.2222             | 125190.6784 |
| <i>sco4742</i> qPCR     | M145  | 8537.9511                | 20930.4167  | 4357.5732               | 5296.4419   |
|                         | M1146 | 11419.1344               | 18153.6444  | 4222.9909               | 1950.2305   |
|                         | M1152 | 12918.5111               | 43531.3111  | 285.0669                | 34175.8477  |
|                         | M1154 | 4387.8222                | 13101.7189  | 2213.0560               | 3519.5415   |
| <i>orf2</i> qPCR        | M145  | 5997.6789                | 2708.6750   | 12902.7733              | 4417.0981   |
|                         | M1146 | 9368.1344                | 6863.8200   | 37073.1889              | 8630.9096   |
|                         | M1152 | 37480.0333               | 25012.4300  | 82189.9333              | 60593.1332  |
|                         | M1154 | 150824.9333              | 86713.3717  | 53790.1944              | 13202.7759  |
| <i>orf3</i> qPCR        | M145  | 5515.3667                | 2638.7566   | 12976.3833              | 2234.6696   |
|                         | M1146 | 7523.9933                | 4836.7022   | 40799.3444              | 8702.7966   |
|                         | M1152 | 37306.2778               | 19727.5478  | 88491.8444              | 71472.0926  |
|                         | M1154 | 165817.4000              | 103186.7773 | 47353.8889              | 12366.3220  |
| <i>orf8</i> qPCR        | M145  | 7893.9733                | 4254.7533   | 20145.3333              | 4968.6979   |
|                         | M1146 | 14153.6789               | 8041.3617   | 60031.9000              | 15219.8171  |
|                         | M1152 | 55394.2556               | 23811.3928  | 99400.3778              | 76083.8014  |
|                         | M1154 | 209497.4667              | 107438.6929 | 69342.2667              | 17018.3550  |

Table S4 continues on the next page.

**Table S4:** Data for Figure 3 (continued).

| Fig.3B                  | 8 hours |           | 3.3 days  |            | 6 days     |            |            |
|-------------------------|---------|-----------|-----------|------------|------------|------------|------------|
|                         | Average | Std. Dev. | Average   | Std. Dev.  | Average    | Std. Dev.  |            |
| Growth                  | M145    | 1.8633    | 0.1007    | 2.4350     | 0.4031     | 1.9367     | 0.2053     |
|                         | M1146   | 2.4367    | 0.3800    | 2.3733     | 0.3592     | 1.8700     | 0.1905     |
|                         | M1152   | 2.6200    | 0.3161    | 2.1900     | 0.0854     | 1.9300     | 0.3291     |
|                         | M1154   | 3.1667    | 0.6901    | 2.7200     | 0.3372     | 1.9133     | 0.2250     |
| CGC(Area Units/ml)      | M145    | 20.0000   | 7.2111    | 1744.6667  | 673.0002   | 1609.3333  | 338.5444   |
|                         | M1146   | 1465.0000 | 1062.0909 | 10420.3333 | 8567.3020  | 9765.0000  | 8459.9490  |
|                         | M1152   | 205.3333  | 38.5270   | 39214.0000 | 523.3670   | 38110.3333 | 1105.3417  |
|                         | M1154   | 264.6667  | 38.5270   | 52856.6667 | 21188.5856 | 52527.0000 | 21436.3807 |
| CGC (Area Units/mg DCW) | M145    | 10.6501   | 3.3488    | 850.0667   | 55.0184    | 834.0908   | 168.0351   |
|                         | M1146   | 604.3239  | 429.0248  | 4171.7267  | 2877.3079  | 5167.5758  | 4175.6145  |
|                         | M1152   | 80.2932   | 24.4773   | 17927.9372 | 861.6937   | 20100.9375 | 3225.0864  |
|                         | M1154   | 85.2809   | 16.2938   | 20010.9101 | 9014.9016  | 27264.0233 | 9473.3562  |

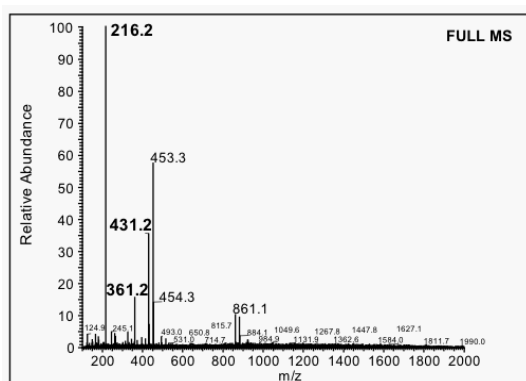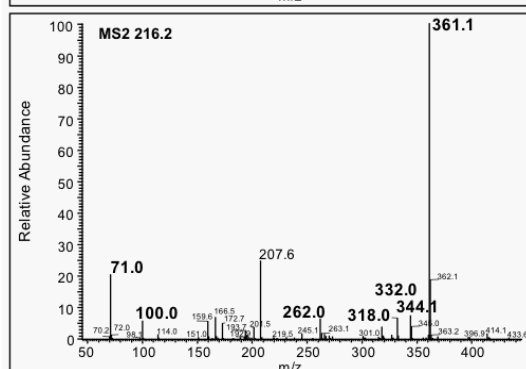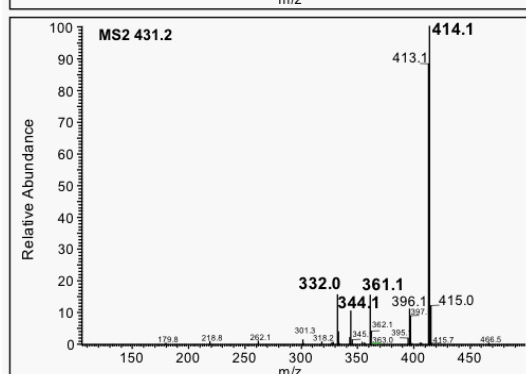

**Fig. S3.** Identification of congocidine. MS/MS analysis of a fraction of the large peak eluting at 10.5 min in the chromatogram from M1154 containing the congocidine gene cluster (Fig. 4). 431 m/z corresponds to congocidine + 1 hydrogen ion ; 453 m/z corresponds to the sodium adduct; 216 m/z corresponds to doubly charged congocidine + 2 hydrogen ions; See Juguet *et al.* (2009) for further explanation of the MS/MS data and fractionation spectra.

#### References for Supporting information

Alting-Mees MA, Short JM (1989) pBluescript II: gene mapping vectors. *Nucleic Acids Res* 17:9494.

Bierman, M., Logan, R., O'Brien, K., Seno, E. T., Rao, R.N., and Schoner, B.E. (1992) Plasmid cloning vectors for the conjugal transfer of DNA from *Escherichia coli* to *Streptomyces* spp. *Gene* 116:43-49.

Hanahan D (1983) Studies on transformation of *Escherichia coli* with plasmids. *J Mol Biol* 166:557-580.

Hesketh A, Koc H, Mootien S, Bibb M (2009) The role of *absC*, a novel regulatory gene for secondary metabolism, in zinc-dependent antibiotic production in *Streptomyces coelicolor* A3(2). *Mol Microbiol* 74:1427-1444.

Rodríguez-García A, Santamarta I, Pérez-Redondo R, Martín JF, Liras P (2006) Characterization of a two-gene operon *epeRA* involved in multidrug resistance in *Streptomyces clavuligerus*. *Res Microbiol* 157:559-568.

Redenbach, M., Kieser, H.M., Denapaite, D., Eichner, A., Cullum, J., Kinashi, H., and Hopwood, D.A. (1996) A set of ordered cosmids and a detailed genetic and physical map for the 8 Mb *Streptomyces coelicolor* A3(2) chromosome. *Mol Microbiol* 21:77-96.

Weaver, D., Karoonuthaisiri, N., Tsai, H.-H., Huang, C.-H., Ho, M.-L., Gai, S., *et al.* (2004) Genome plasticity in *Streptomyces*: identification of 1 Mb TIRs in the *S. coelicolor* A3(2) chromosome. *Mol Microbiol* 51:1535-1550.
